# Fat mass and obesity-associated (FTO) protein interacts with CaMKII and modulates the activity of CREB signaling pathway

Li Lin<sup>1</sup>, Chadwick M. Hales<sup>2</sup>, Kathryn Garber<sup>1</sup> and Peng Jin<sup>1,\*</sup>

<sup>1</sup>Department of Human Genetics and <sup>2</sup>Department of Neurology and Center for Neurodegenerative Diseases, Emory University School of Medicine, Atlanta, GA 30322, USA

Received October 17, 2013; Revised January 15, 2014; Accepted January 27, 2014

**Polymorphisms in the fat mass and obesity-associated (*FTO*) gene have been associated with obesity in humans. *FTO* is a nuclear protein and its physiological function remains largely unknown, but alterations in its expression in mice influence energy expenditure, food intake and, ultimately, body weight. To understand the molecular functions of *FTO*, we performed a yeast two-hybrid screen to identify the protein(s) that could directly interact with human *FTO* protein. Using multiple assays, we demonstrate that *FTO* interacts with three isoforms of calcium/calmodulin-dependent protein kinase II:  $\alpha$ ,  $\beta$  and  $\gamma$ , which are protein kinases that phosphorylate a broad range of substrates. This interaction is functional; overexpression of *FTO* delays the dephosphorylation of cAMP response element-binding protein (CREB) in human neuroblastoma (SK-N-SH) cells, which in turn leads to a dramatic increase in the expression of the CREB targets neuropeptide receptor 1 (*NPY1R*) and brain-derived neurotrophic factor (*BDNF*), which already are known to regulate food intake and energy homeostasis. Thus, our results suggest that *FTO* could modulate obesity by regulating the activity of the CREB signaling pathway.**

## INTRODUCTION

Data from the World Health Organization (WHO) indicate that at least 2.8 million people die each year as a result of being overweight or obese (<http://www.who.int>), due to the increased risk of several serious health conditions, particularly diabetes, hypertension, cardiovascular disease, breathing difficulties during sleep and some cancers (1,2). Although changes in lifestyle are a root cause of the increased rates of obesity throughout many populations, genetic variation influences the risk of obesity, and several genome-wide association studies have sought the identity of the culprit genes.

One consistent result of genetic association studies of body mass index (BMI) and obesity is the fat mass and obesity-associated (*FTO*) gene (3–5). This well-conserved gene is present in a single copy in vertebrates and is broadly expressed with particular abundance in the brain and hypothalamus (6–9). Data from mouse models support the role of *FTO* in the regulation of body mass. Global loss of *Fto* in mice leads to a significant reduction in weight and fat mass compared with wild-type mice. Although *Fto* null mice eat more than their wild-type

counterparts, they also expend more energy (10). Mice that overexpress *Fto*, on the other hand, have increased bodyweight and fat mass resulting primarily from significantly increased food intake in the absence of changes in energy expenditure and physical activity compared with wild-type mice (11).

The physiological role of *FTO* is only beginning to be revealed. Bioinformatics analysis indicated that *FTO* is a member of the AlkB family of non-heme Fe (II)/2-OG-dependent oxidative DNA/RNA demethylases (12). N6-methyladenosine (m6A) is a major physiological substrate of *FTO*. *FTO* efficiently demethylates abundant m6A residues in RNA but has low activity to methylated thymidine (3-meT) and uracil (3-meT) (13). However, how m6A modification is linked to obesity remains to be determined.

In order to better understand the role of *FTO* in the regulation of body mass, we sought binding partners for *FTO* using yeast two-hybrid screens. We discovered an interaction between *FTO* and Calcium/calmodulin-dependent protein kinase II (CaMKII) by yeast hybridization that was confirmed by glutathione *S*-transferases (GST) fusion protein pull-down assays and by co-immunoprecipitation (co-IP). Furthermore, when

\* To whom correspondence should be addressed. Tel: +1 404 727-3729; Fax: +1 404 727-3949; Email: peng.jin@emory.edu

we overexpress FTO in SK-N-SH cells, the interaction of FTO with CaMKII delays cAMP response element-binding protein (CREB) dephosphorylation, which, in turn, enhances the expression of neuropeptide receptor 1 (*NPY1R*) and brain-derived neurotrophic factor (*BDNF*). The RNA demethylase activity of FTO is at least partially required for this effect, as mutant FTO without this activity partially abolishes this induced expression. Overall, our study illustrates a new mechanism by which FTO influences obesity.

## RESULTS

### SKAR, CaMKII $\gamma$ , RFX2 and Dlgap3 are candidate interactors of FTO

To identify the interacting partners of Fto, a human brain cDNA library was screened with a pGBT9-Fto bait construct. Out of 22 positive clones that were sequenced, four candidates were identified: SKAR, RFX2, CaMKII $\gamma$  and Dlgap3 (Fig. 1A). In particular, CaMKII isoforms (both beta and gamma) were identified 16 times. To confirm their interactions with FTO, we made a GST-FTO fusion protein to see if it bound to the candidates in pull-down assays. The GST-FTO fusion protein was purified using glutathione-sepharose beads, then incubated with *in vitro* translated SKAR, CaMKII $\gamma$ , RFX2 or Dlgap3. GST-tag alone was included as a negative control. All four candidates bound to FTO in this assay (Fig. 1B), confirming the interactions suggested by the two-hybrid screen.

### Interaction of CaMKII $\gamma$ and FTO *in vivo* identified by co-IP

Because the prior experiments were performed *in vitro*, we next sought to demonstrate that they occur *in vivo*, using co-IP experiments. Plasmids encoding a FLAG-tagged FTO and an

hemagglutinin (HA)-tagged candidate interactor (SKAR, CaMKII $\gamma$ , RFX2 or Dlgap3) were co-transfected into human embryonic kidney 293 (HEK293) cells. Anti-FLAG beads were used for the IP, and the resulting proteins were eluted and blotted with an anti-HA antibody. Of the four candidate interactors, only CaMKII $\gamma$  was immunoprecipitated in conjunction with FTO. A reverse experiment in which an anti-HA antibody was followed by a western blot with an anti-FLAG antibody also indicated that CaMKII $\gamma$  was the only candidate protein that co-immunoprecipitated with FTO (Fig. 2A).

### Multiple CaMKII isoforms interact with FTO

CaMKII has two additional isoforms, CaMKII $\alpha$  and  $\beta$ . To examine the breadth of interaction between CaMKII and FTO, additional co-IP experiments were performed. The coding region for each isoform was cloned into a pCDNA3 vector, which adds a Myc tag to the inserted sequence. Plasmids encoding FLAG-tagged FTO and a Myc-tagged CaMKII isoform were co-transfected into HEK293 cells. FTO was immunoprecipitated using anti-FLAG beads, and immunoblotting of the resulting precipitate was performed with antibody to the Myc tag. The reverse experiment was carried out by immunoprecipitating with the anti-Myc antibody, followed by immunoblotting with the anti-FLAG antibody. These experiments consistently indicated that all three forms of CaMKII $\alpha$ ,  $\beta$  and  $\gamma$  co-IP with FTO (Fig. 2B).

### CREB phosphorylation is regulated by FTO

To investigate the consequences of the interaction of FTO with CaMKII, we first explored its role in phosphorylation status of the two interacting proteins. CaMKII did not phosphorylate full-length recombinant mouse Fto (mFto) nor the C-terminal domain (327–502 amino acids) alone (Fig. 3A). Neither did

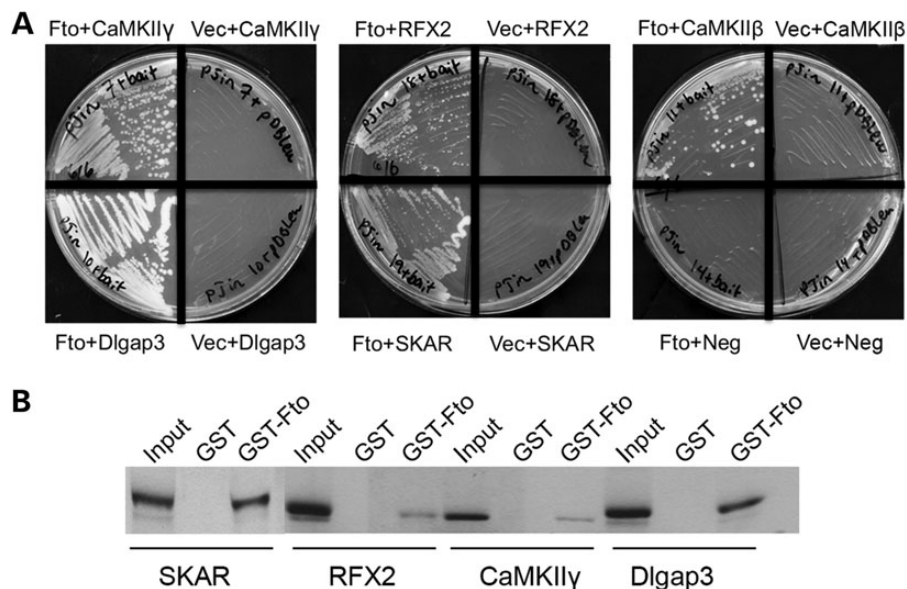

**Figure 1.** Identification of FTO-interacting partners through yeast two-hybrid screen. (A) Representative plates showing the specific interactions between FTO and the indicated proteins identified through yeast two-hybrid screen. (B) Direct interaction between FTO and SKAR (or RFX2, CaMKII $\gamma$  and Dlgap3) by glutathione *S*-transferases (GST) pull-down assay. One of the *in vitro* translated ( $^{35}$ S) methionine-labeled proteins SKAR, RFX2, CaMKII $\gamma$  or Dlgap3 was incubated with GST-Fto or GST-coated beads. After extensive washing, the bound proteins and 10% input were resolved on a 6% polyacrylamide gel followed by autoradiography.

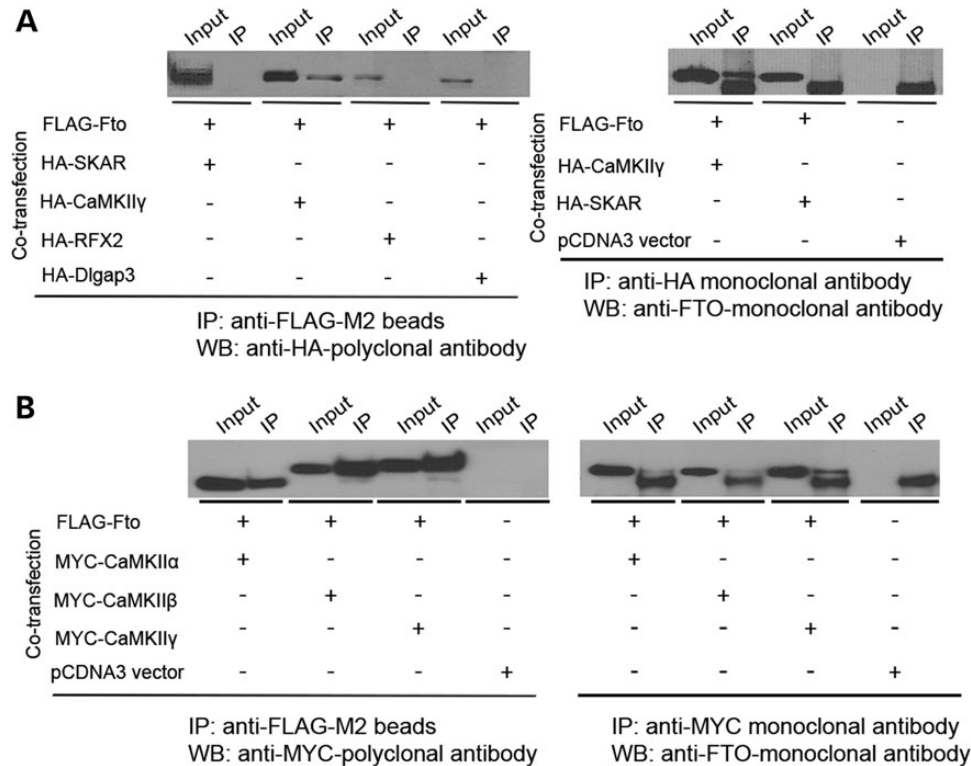

**Figure 2.** CaMKII isoforms are associated with FTO *in vivo*. (A) Co-IP of mouse FTO with SKAR, RFX2, CaMKII $\gamma$  and Dlgap3. 293T cells were transfected with FLAG-tagged FTO and hemagglutinin (HA)-tagged SKAR (or RFX2, CaMKII $\gamma$ , Dlgap3) and subjected to IP with anti-FLAG beads or anti-HA antibody followed by immunoblotting with antibodies as indicated. 5% of cell lysate was loaded as input. (B) Co-IP of mouse FTO with CaMKII $\alpha$ ,  $\beta$  and  $\gamma$ . 293T cells were transfected with FLAG-tagged FTO and MYC-tagged CaMKII  $\alpha$  (or  $\beta$  or  $\gamma$ ) and subjected to IP with anti-FLAG beads or anti-MYC antibody followed by immunoblotting with antibodies as indicated. 5% of cell lysate was loaded as input.

excess full-length recombinant mFto affect CaMKII phosphorylation activity significantly (Fig. 3B). Thus, we turned our attention to another known substrate of CaMKII, CREB. We assayed CREB phosphorylation in human neuroblastoma (SK-N-SH) cells in which FTO was overexpressed. A lentivirus containing *Fto* was prepared in HEK293 cells and used to infect SK-N-SH cells. Forty-eight hours after infection, the cells were serum-starved for 24 h, then stimulated with 20  $\mu$ M of forskolin for different time periods to stimulate neuronal differentiation. Phosphorylation of CREB was measured by western blotting. An increase in CREB phosphorylation was observed from the initial time point of 5 min of forskolin stimulation (Fig. 4). The effect of forskolin on CREB phosphorylation exhibited different kinetics in the cells infected with lenti-Fto compared with the lenti-GFP control. Whereas in the GFP expressing cells, CREB phosphorylation was weakened with 30 min of forskolin stimulation, it did not begin to go down until 60 min of forskolin stimulation in Lenti-Fto infected cells (Fig. 4). These results suggest that overexpression of FTO delays the dephosphorylation of CREB.

Furthermore, to determine whether FTO-mediated modulation on CREB phosphorylation depends on the FTO demethylation activity, we performed parallel analyses using a previously described mutant FTO protein in which two iron (II) ligands were mutated (H231A, D233A), resulting in complete loss of m<sup>6</sup>A-demethylation activity (13). We found that the mutant FTO lacking m<sup>6</sup>A-demethylation activity did not delay CREB dephosphorylation to the same extent as wild-type FTO, suggesting

that the m<sup>6</sup>A-demethylation activity of FTO is involved in the FTO-mediated modulation of CREB phosphorylation.

#### Expression of *BDNF* and *NPY* receptor 1 are increased in FTO-overexpressing cells

CREB phosphorylation can either stimulate or inhibit its target genes by binding to the regulatory CREs (14). Because we observed that the dephosphorylation of CREB was delayed in the presence of excess FTO, we next asked whether the expression levels of known CREB target genes were affected. Using real-time quantification PCR, we examined three known CREB target genes: *NPY*, *NPY1R* and *BDNF*. Whereas the expression levels of *NPY1R* and *BDNF* were significantly increased after 30 min of forskolin stimulation in Lenti-Fto infected cells, expression levels of *CREB* and *NPY* were unchanged (Fig. 5). Differences in the activation of *NPY1R* and *BDNF* expression between Lenti-GFP and Lenti-Fto infected cells are likely a result of the delayed dephosphorylation of CREB that was demonstrated in the previous experiments. Consistent with this notion, the expression of mutant Fto induced significantly less expression of *NPY1R* and *BDNF* after 30 min of forskolin stimulation (Fig. 5).

#### DISCUSSION

The association of FTO with obesity is well established. The initial report identified a single-nucleotide polymorphism

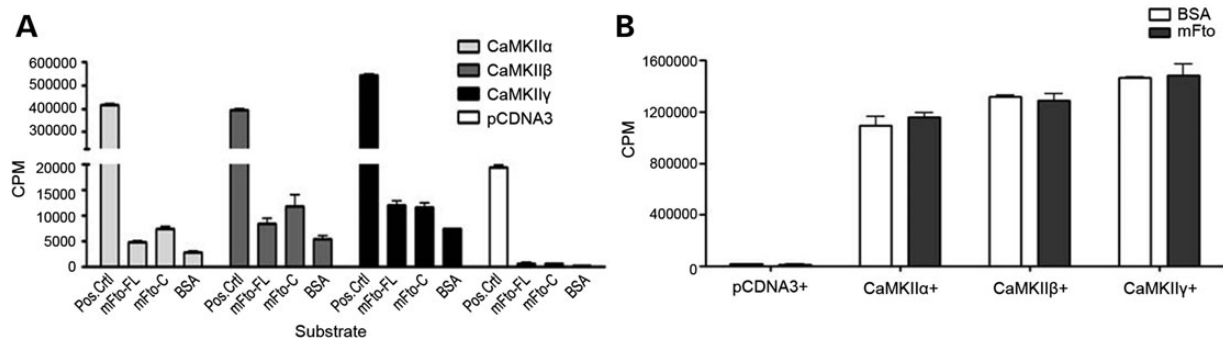

**Figure 3.** CaMKII does not phosphorylate Fto and Fto does not modulate CaMKII phosphorylation activity. (A) CaMKII does not phosphorylate Fto. The substrates included 25  $\mu\text{M}$  of purified recombinant full-length mFto or the C-terminal domain of mFto, bovine serum albumin and a control peptide provided by the manufacturer. HEK293 cells were transfected with Myc-CaMKII $\alpha$ ,  $\beta$  or  $\gamma$  and cell lysates were immunoprecipitated with an anti-Myc antibody. The immunoprecipitated proteins were added to the reactions. (B) FTO does not modulate CaMKII phosphorylation activity. The CaMKII target peptide provided by the manufacturer was used as the substrate. The immunoprecipitated proteins and 100 ng of purified recombinant full-length mouse FTO or BSA were added to the reactions. CPM, counts per minute; Pos.Ctrl, positive control; mFto-FL, recombinant full-length mouse Fto; mFto-C, C-terminal domain of mouse Fto; BSA, bovine serum albumin.

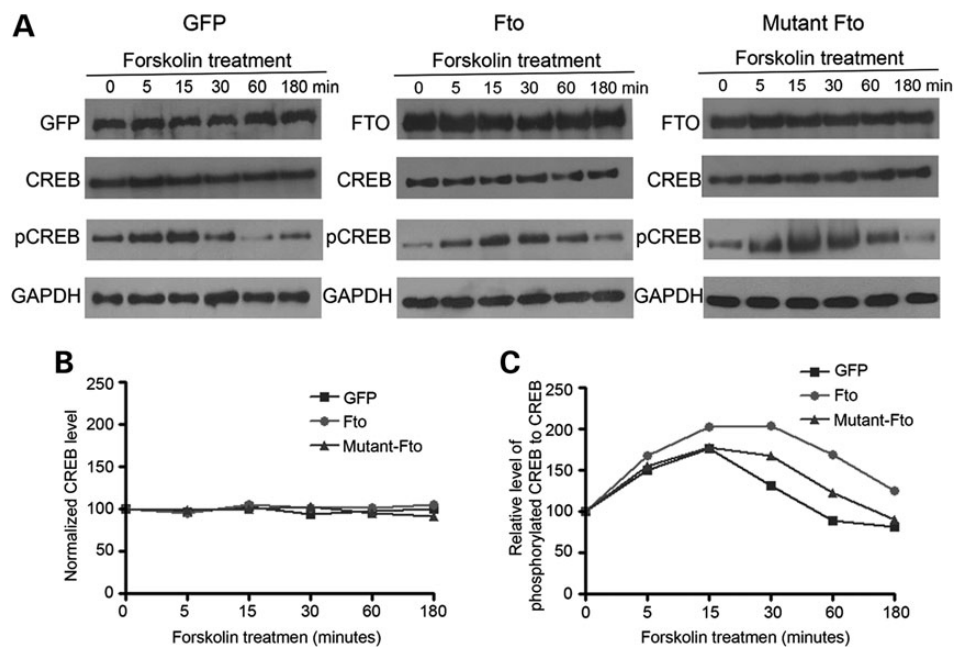

**Figure 4.** FTO modulates the dynamics of CREB phosphorylation. SK-N-SH cells were infected with Lenti-GFP, Lenti-Fto or Lenti-mutant-Fto viruses for 72 h. After starving for another 24 h in FBS free medium, infected cells were treated with 20  $\mu\text{M}$  of forskolin for 0, 5, 15, 30, 60 and 180 min, and then cells were harvested for western blotting with antibodies as indicated (top panel) and densitometry plots (bottom panel) of relative levels of phosphorylated CREB compared with total CREB. The x-axis is forskolin treatment time points and the y-axis is relative intensity of signal phosphorylated CREB to CREB by densitometry.

(SNP) in the first intron of *FTO* (rs9939609) that was strongly associated with type 2 diabetes and increased BMI in a UK population (7). Following this report, associations between additional SNPs in *FTO* and human BMI have been reported in various populations (3,15–17). The link between *FTO* risk alleles and obesity has been supported by both loss-of-function and overexpression mouse models (10,11). The identification of m6A residues in RNA as a physiological target that is oxidatively demethylated has increased our understanding of the activity of this protein (13), but the mechanism by which this influences obesity has largely been unknown. We report here a functional pathway that links FTO with obesity: FTO  $\Rightarrow$  CaMKII  $\Rightarrow$  CREB  $\Rightarrow$  NPY. Increased FTO expression delays CREB

dephosphorylation by interacting with CaMKII, resulting in the increased gene expression of NPY1R and BDNF. These two proteins, in turn, are already known to regulate food intake and energy homeostasis, thereby connecting the pathway with BMI and obesity.

CaMKII is a serine/threonine protein kinase family encoded by four genes ( $\alpha$ ,  $\beta$ ,  $\gamma$  and  $\delta$ ) in mammals (18). CaMKII $\alpha$  and  $\beta$  are highly expressed in neurons (19–22). CaMKII is regulated by multiple phosphorylation sites that alter its enzymatic activity and induce its interaction with other proteins (23). CaMKII phosphorylates a broad range of substrates, which are involved in numerous physiological pathways, including cell development, proliferation, cellular transport and neuronal function (24–28).

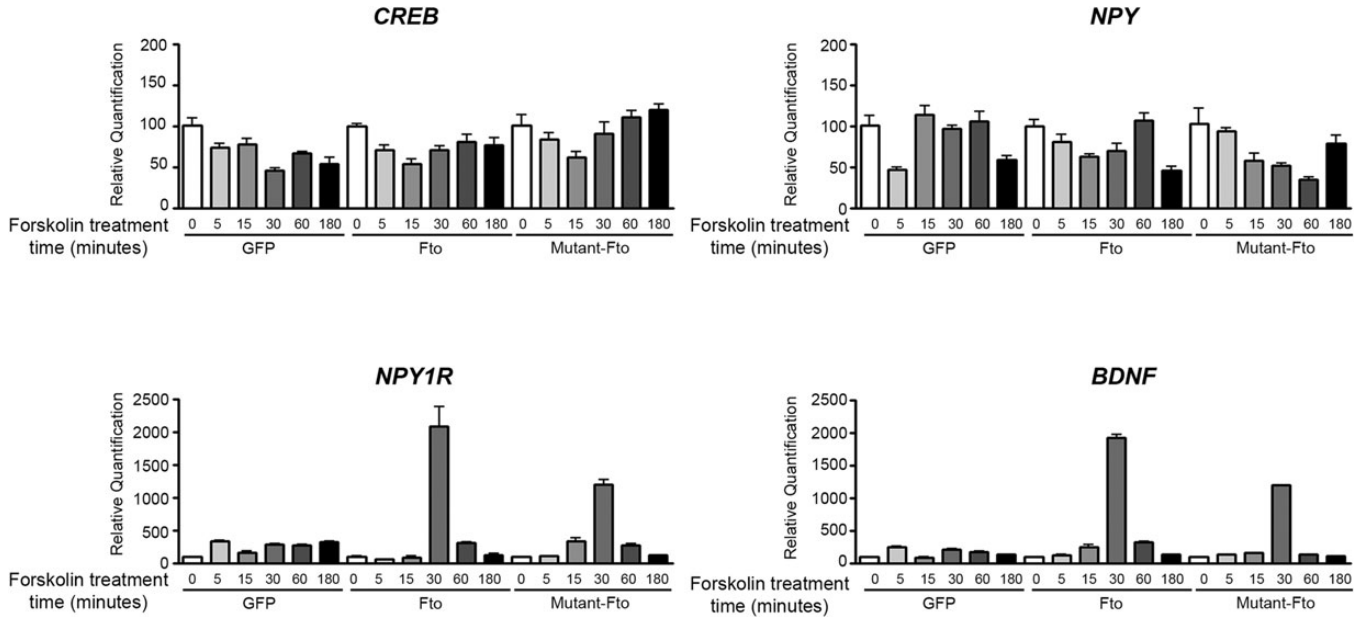

**Figure 5.** FTO modulates the expression dynamics of selective transcripts in response to forskolin stimulation. Total RNAs were purified from SK-N-SH cells that were infected with Lenti-GFP, Lenti-Fto or Lenti-mutant-Fto viruses and treated with 20  $\mu\text{M}$  of forskolin for 0, 5, 15, 30, 60 and 180 min. A real-time reverse transcription polymerase chain reaction analysis was performed to quantify *CREB*, *NPY*, *NPY1R* and *BDNF* mRNA expression ( $n = 3$ , mean  $\pm$  SD). Relative levels of each transcript are plotted relative to samples without forskolin stimulation.

CaMKII has also been reported to regulate hepatic glucose homeostasis in obesity (29).

Interactions between signaling molecules and various protein-binding partners are critical for cells to respond appropriately to their physiological status. CaMKII is an essential cellular kinase that binds to and phosphorylates a variety of targets in response to stimuli. Numerous binding proteins of CaMKII have been identified via binding or IP assays. For example, CaMKII binds to and phosphorylates tau and amyloid precursor protein, which are key proteins in the pathogenesis of Alzheimer's disease (AD) (30,31). At the same time, CaMKII auto-phosphorylation is altered in the brains of AD patients (32). CaMKII also binds to the cyclin-dependent kinase 5 activators p35 and p39 (33), suggesting that CaMKII is involved in a signaling pathway that contributes to synaptic plasticity, memory and learning. Targets of CaMKII may achieve a functional effect in one of two ways; the interaction might alter the kinase activity of CaMKII through an allosteric mechanism, or it might direct CaMKII to its substrates, thereby leading to faster and more efficient phosphorylation of key proteins. In our case, we found that FTO did not alter the kinase activity of CaMKII. Therefore, a plausible explanation is that binding of FTO to CaMKII induces CaMKII to phosphorylate CREB, in that way resulting in the prolongation of CREB phosphorylation.

CREB is a transcriptional activator and promotes adipogenesis by regulating glucose homeostasis (34). It has been reported that CREB can be phosphorylated by CaMKII (35,36). Phospho-CREB, by binding to CRE, leads to stimulation or inhibition of target genes, such as *NPY* and *BDNF*, indicating that CREB is a regulator of *NPY* (37). *NPY* is a 36-amino acid peptide with widespread distribution in the brain (38–41). It mediates food intake and decreases physical activity by acting through its receptors (40,42–44). Five known *NPY* receptors (Y1 through

Y5) have been found in mammals (45–47). It has been shown that hypothalamic *NPY* expression is up-regulated by fasting, and the blockade of *NPY* receptors leads to the inhibition of *NPY*ergic activity, and a resulting reduction in food intake (48–51). *BDNF* also is regulated by CREB. *BDNF* is a member of the neurotrophin family and is widely expressed throughout the central nervous system and skeletal muscles (52–55). *BDNF* plays a critical role in normal neural development (56–61); knockout of *BDNF* in mice results in developmental defects in the brain, and the mice die soon after birth (62). *BDNF* regulates energy homeostasis through binding to tropomyosin-related kinase B receptor (63–67). Central injection of *BDNF* gradually reduces food intake and causes body weight loss in rats (68,69). Genome-wide associated studies found that SNPs in *BDNF* are associated with BMI and obesity (70,71).

In our study, mRNA levels of *NPY1R* and *BDNF* were significantly increased in FTO-overexpressing cells. The time at which *NPY1R* and *BDNF* mRNA levels are maximal matches perfectly with the prolongation of CREB phosphorylation that occurs in conjunction with FTO overexpression. Thus, we suggest that expression levels of *NPY1R* and *BDNF* are affected by CREB through *NPY* and that FTO plays a role in obesity by regulating the CREB signaling system. The RNA demethylase activity of FTO contributes to this activity but does not fully explain the effects we see; a mutant form of FTO has an intermediate effect on CREB phosphorylation and induction of *NPY1R* and *BDNF* expression compared with overexpression of wild-type FTO and to the control samples.

In sum, we propose a cellular mechanism by which FTO functions in obesity. The interaction of FTO with CaMKII triggers the prolongation of CREB phosphorylation, which ultimately affects the expression levels of at least two key genes that

regulate energy balance, *BDNF* and *NPY1R*. These results provide new targets for the development of therapeutic approaches to obesity.

## MATERIALS AND METHODS

### Plasmid construction

Full-length mFto complementary DNA was cloned using mouse brain cDNA library. The coding region was then cloned into the pGEX-2TK vector or the pCDNA3 vector or the Lenti-GFP vector (with Flag tag). The full-length Fto coding region with mutation at H231A and D233A (kindly provided by Dr Chuan He at University of Chicago) was cloned into the Lenti-GFP vector. Full-length cDNAs of SKAR, CaMKII $\gamma$ , RFX2 and Dlgap3 were cloned into the pCDNA3 vector (with HA tag). Full-length CaMKII $\alpha$ ,  $\beta$  and  $\gamma$  cDNAs were cloned into the pCDNA3 vector (with Myc tag). The sequences of all constructs were confirmed by DNA sequencing.

### Yeast two-hybrid screen

The full-length mFto cDNA was fused in frame with the GAL4 DNA-binding domain of the pGBT9 vector to generate pGBT9-Fto bait construct. Yeast two-hybrid screening service was provided by Duke University Genomic Core. Briefly, pGBT9-Fto construct was co-transfected with human cDNA keratinocyte libraries in *Saccharomyces cerevisiae*. Positive clones were identified by TRP1 selection at 0 mM 3-aminotriazol. All positive clones were sequenced by Sanger sequencing. The details of the pGBT9-Fto bait construction and yeast two-hybrid screening protocols are available upon request.

### GST fusion protein purification and GST pull down assay

BL21 (DE3) pLysS Competent Cells (Promega) were transformed with GST constructs (both GST and GST-Fto), and single colonies were grown in 10 ml of Lysogenic Broth (LB)/ampicillin (100  $\mu$ g/ml) overnight at 37°C. 500 ml of LB were inoculated with 10 ml of overnight culture at 37°C with shaking for ~2 h until absorbance at 600 nm reached between 0.6. Culture was induced with 16  $\mu$ M isopropyl  $\beta$ -D-1-thiogalactopyranoside and grown at 28°C for 6 h. Cells were pelleted by centrifugation at 3000g for 15 min and washed twice with ice-cold 1  $\times$  phosphate buffered saline (PBS). Cells were resuspended in 1 ml of ice-cold Tris-buffered saline and 1 ml of Profound Lysis buffer (Pierce) with 1  $\times$  Complete ethylenediamine-tetra-acetic acid (EDTA)-free protease inhibitor complex (Roche) and inverted to mix immediately. The cellular resuspension was incubated on ice for 30 min. Lysate was centrifuged at 12 000g for 10 min. Supernatant was collected and stored at -80°C until use. Glutathione-sepharose beads (Amersham-Pharmacia) were washed and resuspended in 1  $\times$  PBS, to make a 50%-bead slurry. 200  $\mu$ l of bead slurry was incubated with 200  $\mu$ l bacterial lysate for 1 h at 4°C. Beads were washed twice with 1  $\times$  PBS with 0.5% Triton X-100. In a 1.5-ml tube, 200  $\mu$ l of GST/or GST-FTO beads were incubated with 22  $\mu$ l of the appropriate *in vitro* translated protein (SKAR, CaMKII $\gamma$ , RFX2 or Dlgap3; TnT Coupled Reticulocyte Lysate Systems, Promega) diluted with 180  $\mu$ l of ice-cold binding buffer (1  $\times$  PBS; 0.2%

Triton X-100; Protease Inhibitor) at 4°C for 2 h. Beads were then washed twice with 1 ml of binding buffer. The beads were resuspended with protein loading buffer and denatured at 100°C for 5 min. Supernatants were separated by 6% polyacrylamide gel electrophoresis (PAGE) for analysis.

### Co-immunoprecipitation

HEK293 cells were cultured and transfected with 10  $\mu$ g of the each relevant plasmid using Lipofectamine 2000 (Invitrogen) on 10-cm plate, according to the instructions of the manufacturer. After 48 h, cells were harvested and lysed in lysis buffer [50 mM Tris-HCl (pH 7.5), 150 mM NaCl, 0.5 mM EDTA, 0.5 mM dithiothreitol, 10% glycerol and 0.5% Triton X-100 supplemented with complete protease inhibitor cocktail]. Lysates were kept on ice for 30 min and cell debris was removed by centrifugation. Following the addition of 50  $\mu$ l Protein A Agarose (Invitrogen), supernatants were incubated with mouse monoclonal anti-myc or anti-HA antibody overnight at 4°C. [Alternatively, supernatants were incubated with anti-FLAG beads (Sigma).] The beads were pelleted by centrifugation; the supernatant was removed, and the pelleted beads were washed three times with 1 ml of washing buffer [50 mM Tris-HCl (pH 7.5), 150 mM NaCl, 5% glycerol and 0.1% Triton X-100]. Proteins were eluted with 50  $\mu$ l of protein loading buffer for 5 min at 100°C. Inputs and co-IPs were subjected to sodium dodecyl sulfate-PAGE and transferred to polyvinylidene difluoride membranes (Millipore).

### Western blotting

For analysis of the IPs, western blots carrying inputs and immunoprecipitated samples were first incubated with primary antibody (mouse anti-HA or mouse anti-FTO or mouse anti-MYC) followed by appropriate horseradish peroxidase-conjugated antibodies. Membranes were processed following the HyGLO Quick Spray western blotting protocol (Denville). For loading controls, membranes were stripped and re-probed with the antibody against GAPDH (Ambion).

### CaMKII activity assay

CaMKII activity assay was performed using CaM Kinase II Assay kit (Upstate) following the manufacturer's instructions. To determine whether CaMKII can phosphorylate FTO, the substrates were used 25  $\mu$ M of purified recombinant full-length mouse FTO or the C-terminal domain of mouse FTO. Bovine serum albumin (BSA) was used as a negative substrate. The positive control was a control peptide from the kit. HEK293 cells were transfected with Myc-CaMKII $\alpha$ ,  $\beta$  and  $\gamma$  and cells lysate were immunoprecipitated with an anti-MYC antibody. The Protein A Agarose and corresponding IPs were added to the reactions. To determine whether FTO can affect CaMKII phosphorylation activity, the IPed Protein A Agarose and 100 ng of recombinant full-length mouse FTO or BSA were added to the reactions. Peptide from the kit was used as the substrate.

### Virus infection and forskolin treatment

Lenti-GFP, Lenti-Fto and Lenti-mutant-Fto viruses were packaged according to the method described previously (72).

SK-N-SH cells were cultured and infected 72 h by Lenti-GFP or Lenti-Fto viruses. After starving for 24 h in FBS free medium, cells were treated with 20  $\mu\text{M}$  of forskolin for 0, 5, 15, 30, 60 and 180 min, then media were removed and cells were harvested in ice-cold PBS and separated into two parts, one for total RNA purification and another one for western blotting.

### Reverse transcription and real-time PCR

Total RNAs were purified using the standard TRIzol method (Invitrogen). Reverse transcription was carried out using SuperScript III Reverse Transcriptase (Invitrogen) according to the instructions of the manufacturer. Messenger RNA real-time PCR assays were performed according to protocols provided by the vendor as described previously (73). Relative quantities were determined via the  $\Delta\Delta\text{Ct}$  method (74). All relative quantity calculations were calibrated to control samples. Three biological replicates were assayed.

### ACKNOWLEDGMENTS

We would like to thank Dr Chuan He (University of Chicago) for providing the Fto constructs.

*Conflict of Interest statement.* None declared.

### FUNDING

This work was supported in part NIH grant NS051630 (P.J.).

### REFERENCES

- Haslam, D.W. and James, W.P. (2005) Obesity. *Lancet*, **366**, 1197–1209.
- Barness, L.A., Opitz, J.M. and Gilbert-Barness, E. (2007) Obesity: genetic, molecular, and environmental aspects. *Am. J. Med. Genet. A*, **143A**, 3016–3034.
- Dina, C., Meyre, D., Gallina, S., Durand, E., Korner, A., Jacobson, P., Carlsson, L.M., Kiess, W., Vatin, V., Lecoq, C. *et al.* (2007) Variation in FTO contributes to childhood obesity and severe adult obesity. *Nat. Genet.*, **39**, 724–726.
- Hinney, A., Nguyen, T.T., Scherag, A., Friedel, S., Bronner, G., Muller, T.D., Grallert, H., Illig, T., Wichmann, H.E., Rief, W. *et al.* (2007) Genome wide association (GWA) study for early onset extreme obesity supports the role of fat mass and obesity associated gene (FTO) variants. *PLoS One*, **2**, e1361.
- Scuteri, A., Sanna, S., Chen, W.M., Uda, M., Albai, G., Strait, J., Najjar, S., Nagaraja, R., Orru, M., Usala, G. *et al.* (2007) Genome-wide association scan shows genetic variants in the FTO gene are associated with obesity-related traits. *PLoS Genet.*, **3**, e115.
- Fredriksson, R., Hagglund, M., Olszewski, P.K., Stephansson, O., Jacobsson, J.A., Olszewska, A.M., Levine, A.S., Lindblom, J. and Schiöth, H.B. (2008) The obesity gene, FTO, is of ancient origin, up-regulated during food deprivation and expressed in neurons of feeding-related nuclei of the brain. *Endocrinology*, **149**, 2062–2071.
- Frayling, T.M., Timpson, N.J., Weedon, M.N., Zeggini, E., Freathy, R.M., Lindgren, C.M., Perry, J.R., Elliott, K.S., Lango, H., Rayner, N.W. *et al.* (2007) A common variant in the FTO gene is associated with body mass index and predisposes to childhood and adult obesity. *Science*, **316**, 889–894.
- Gerken, T., Girard, C.A., Tung, Y.C., Webby, C.J., Saudek, V., Hewitson, K.S., Yeo, G.S., McDonough, M.A., Cunliffe, S., McNeill, L.A. *et al.* (2007) The obesity-associated FTO gene encodes a 2-oxoglutarate-dependent nucleic acid demethylase. *Science*, **318**, 1469–1472.
- Tung, Y.C., Ayuso, E., Shan, X., Bosch, F., O'Rahilly, S., Coll, A.P. and Yeo, G.S. (2010) Hypothalamic-specific manipulation of Fto, the ortholog of the human obesity gene FTO, affects food intake in rats. *PLoS One*, **5**, e8771.
- Fischer, J., Koch, L., Emmerling, C., Vierkotten, J., Peters, T., Bruning, J.C. and Ruther, U. (2009) Inactivation of the Fto gene protects from obesity. *Nature*, **458**, 894–898.
- Church, C., Moir, L., McMurray, F., Girard, C., Banks, G.T., Teboul, L., Wells, S., Bruning, J.C., Nolan, P.M., Ashcroft, F.M. *et al.* (2010) Overexpression of Fto leads to increased food intake and results in obesity. *Nat. Genet.*, **42**, 1086–1092.
- Sanchez-Pulido, L. and Andrade-Navarro, M.A. (2007) The FTO (fat mass and obesity associated) gene codes for a novel member of the non-heme dioxygenase superfamily. *BMC Biochem.*, **8**, 23.
- Jia, G., Fu, Y., Zhao, X., Dai, Q., Zheng, G., Yang, Y., Yi, C., Lindahl, T., Pan, T., Yang, Y.G. *et al.* (2011) N6-methyladenosine in nuclear RNA is a major substrate of the obesity-associated FTO. *Nat. Chem. Biol.*, **7**, 885–887.
- Brindle, P.K. and Montminy, M.R. (1992) The CREB family of transcription activators. *Curr. Opin. Genet. Dev.*, **2**, 199–204.
- Cha, S.W., Choi, S.M., Kim, K.S., Park, B.L., Kim, J.R., Kim, J.Y. and Shin, H.D. (2008) Replication of genetic effects of FTO polymorphisms on BMI in a Korean population. *Obesity*, **16**, 2187–2189.
- Chang, Y.C., Liu, P.H., Lee, W.J., Chang, T.J., Jiang, Y.D., Li, H.Y., Kuo, S.S., Lee, K.C. and Chuang, L.M. (2008) Common variation in the fat mass and obesity-associated (FTO) gene confers risk of obesity and modulates BMI in the Chinese population. *Diabetes*, **57**, 2245–2252.
- Loos, R.J., Lindgren, C.M., Li, S., Wheeler, E., Zhao, J.H., Prokopenko, I., Inouye, M., Freathy, R.M., Attwood, A.P., Beckmann, J.S. *et al.* (2008) Common variants near MC4R are associated with fat mass, weight and risk of obesity. *Nat. Genet.*, **40**, 768–775.
- Miller, S.G. and Kennedy, M.B. (1985) Distinct forebrain and cerebellar isozymes of type II Ca<sup>2+</sup>/calmodulin-dependent protein kinase associate differently with the postsynaptic density fraction. *J. Biol. Chem.*, **260**, 9039–9046.
- Miller, S., Yasuda, M., Coats, J.K., Jones, Y., Martone, M.E. and Mayford, M. (2002) Disruption of dendritic translation of CaMKII $\alpha$  impairs stabilization of synaptic plasticity and memory consolidation. *Neuron*, **36**, 507–519.
- Taha, S., Hanover, J.L., Silva, A.J. and Stryker, M.P. (2002) Autophosphorylation of alphaCaMKII is required for ocular dominance plasticity. *Neuron*, **36**, 483–491.
- Cao, X., Wang, H., Mei, B., An, S., Yin, L., Wang, L.P. and Tsien, J.Z. (2008) Inducible and selective erasure of memories in the mouse brain via chemical-genetic manipulation. *Neuron*, **60**, 353–366.
- von Hertzen, L.S. and Giese, K.P. (2005) Alpha-isoform of Ca<sup>2+</sup>/calmodulin-dependent kinase II autophosphorylation is required for memory consolidation-specific transcription. *Neuroreport*, **16**, 1411–1414.
- Means, A.R. (2000) Regulatory cascades involving calmodulin-dependent protein kinases. *Mol. Endocr.*, **14**, 4–13.
- Hudmon, A. and Schulman, H. (2002) Structure-function of the multifunctional Ca<sup>2+</sup>/calmodulin-dependent protein kinase II. *Biochem. J.*, **364**, 593–611.
- Hudmon, A. and Schulman, H. (2002) Neuronal CA<sup>2+</sup>/calmodulin-dependent protein kinase II: the role of structure and autoregulation in cellular function. *Annu. Rev. Biochem.*, **71**, 473–510.
- Giese, K.P., Fedorov, N.B., Filipkowski, R.K. and Silva, A.J. (1998) Autophosphorylation at Thr286 of the alpha calcium-calmodulin kinase II in LTP and learning. *Science*, **279**, 870–873.
- Soderling, T.R. and Derkach, V.A. (2000) Postsynaptic protein phosphorylation and LTP. *Trends Neurosci.*, **23**, 75–80.
- Skelding, K.A. and Rostas, J.A. (2009) Regulation of CaMKII in vivo: the importance of targeting and the intracellular microenvironment. *Neurochem. Res.*, **34**, 1792–1804.
- Ozcan, L., Wong, C.C., Li, G., Xu, T., Pajvani, U., Park, S.K., Wronska, A., Chen, B.X., Marks, A.R., Fukamizu, A. *et al.* (2012) Calcium signaling through CaMKII regulates hepatic glucose production in fasting and obesity. *Cell Metab.*, **15**, 739–751.
- Wang, J.Z., Grundke-Iqbal, I. and Iqbal, K. (2007) Kinases and phosphatases and tau sites involved in Alzheimer neurofibrillary degeneration. *Eur. J. Neurosci.*, **25**, 59–68.
- Xiao, J., Perry, G., Troncoso, J. and Monteiro, M.J. (1996) alpha-calcium-calmodulin-dependent kinase II is associated with paired helical filaments of Alzheimer's disease. *J. Neuropathol. Exp. Neurol.*, **55**, 954–963.
- Amada, N., Aihara, K., Ravid, R. and Horie, M. (2005) Reduction of NR1 and phosphorylated Ca<sup>2+</sup>/calmodulin-dependent protein kinase II levels in Alzheimer's disease. *Neuroreport*, **16**, 1809–1813.
- Dhavan, R., Greer, P.L., Morabito, M.A., Orlando, L.R. and Tsai, L.H. (2002) The cyclin-dependent kinase 5 activators p35 and p39 interact with

- the alpha-subunit of Ca<sup>2+</sup>/calmodulin-dependent protein kinase II and alpha-actinin-1 in a calcium-dependent manner. *J. Neurosci. Official J. Soc. Neurosci.*, **22**, 7879–7891.
34. Qi, L., Saberi, M., Zmuda, E., Wang, Y., Altarejos, J., Zhang, X., Dentin, R., Hedrick, S., Bandyopadhyay, G., Hai, T. *et al.* (2009) Adipocyte CREB promotes insulin resistance in obesity. *Cell Metab.*, **9**, 277–286.
  35. Kornhauser, J.M., Cowan, C.W., Shaywitz, A.J., Dolmetsch, R.E., Griffith, E.C., Hu, L.S., Haddad, C., Xia, Z. and Greenberg, M.E. (2002) CREB transcriptional activity in neurons is regulated by multiple, calcium-specific phosphorylation events. *Neuron*, **34**, 221–233.
  36. Matthews, R.P., Guthrie, C.R., Wailes, L.M., Zhao, X., Means, A.R. and McKnight, G.S. (1994) Calcium/calmodulin-dependent protein kinase types II and IV differentially regulate CREB-dependent gene expression. *Mol. Cell. Biol.*, **14**, 6107–6116.
  37. Pandey, S.C. (2003) Anxiety and alcohol abuse disorders: a common role for CREB and its target, the neuropeptide Y gene. *Trends Pharmacol. Sci.*, **24**, 456–460.
  38. Everitt, B.J., Hokfelt, T., Terenius, L., Tatemoto, K., Mutt, V. and Goldstein, M. (1984) Differential co-existence of neuropeptide Y (NPY)-like immunoreactivity with catecholamines in the central nervous system of the rat. *Neurosci.*, **11**, 443–462.
  39. Allen, J.M., Hughes, J. and Bloom, S.R. (1987) Presence, distribution, and pharmacological effects of neuropeptide Y in mammalian gastrointestinal tract. *Dig. Dis. Sci.*, **32**, 506–512.
  40. Zukowska, Z., Pons, J., Lee, E.W. and Li, L. (2003) Neuropeptide Y: a new mediator linking sympathetic nerves, blood vessels and immune system? *Can. J. Physiol. Pharm.*, **81**, 89–94.
  41. Allen, Y.S., Adrian, T.E., Allen, J.M., Tatemoto, K., Crow, T.J., Bloom, S.R. and Polak, J.M. (1983) Neuropeptide Y distribution in the rat brain. *Science*, **221**, 877–879.
  42. Thorsell, A. and Heilig, M. (2002) Diverse functions of neuropeptide Y revealed using genetically modified animals. *Neuropeptides*, **36**, 182–193.
  43. Kalra, S.P., Dube, M.G., Pu, S., Xu, B., Horvath, T.L. and Kalra, P.S. (1999) Interacting appetite-regulating pathways in the hypothalamic regulation of body weight. *Endocr. Rev.*, **20**, 68–100.
  44. Beck, B. (2006) Neuropeptide Y in normal eating and in genetic and dietary-induced obesity. *Philos. Trans. R. Soc. Lond. B. Biol. Sci.*, **361**, 1159–1185.
  45. Burkhoff, A., Linemeyer, D.L. and Salon, J.A. (1998) Distribution of a novel hypothalamic neuropeptide Y receptor gene and its absence in rat. *Brain Res. Mol. Brain Res.*, **53**, 311–316.
  46. Widdowson, P.S., Buckingham, R. and Williams, G. (1997) Distribution of [Leu31,Pro34]NPY-sensitive, BIBP3226-insensitive [125I]PYY(3–36) binding sites in rat brain: possible relationship to Y5 NPY receptors. *Brain Res.*, **778**, 242–250.
  47. Henry, M., Ghibaudi, L., Gao, J. and Hwa, J.J. (2005) Energy metabolic profile of mice after chronic activation of central NPY Y1, Y2, or Y5 receptors. *Obes. Res.*, **13**, 36–47.
  48. King, P.J., Widdowson, P.S., Doods, H.N. and Williams, G. (1999) Regulation of neuropeptide Y release by neuropeptide Y receptor ligands and calcium channel antagonists in hypothalamic slices. *J. Neurochem.*, **73**, 641–646.
  49. King, P.J., Williams, G., Doods, H. and Widdowson, P.S. (2000) Effect of a selective neuropeptide Y Y2 receptor antagonist, BIIE0246 on neuropeptide Y release. *Eur. J. Pharmacol.*, **396**, R1–R3.
  50. Pomonis, J.D., Levine, A.S. and Billington, C.J. (1997) Interaction of the hypothalamic paraventricular nucleus and central nucleus of the amygdala in naloxone blockade of neuropeptide Y-induced feeding revealed by c-fos expression. *J. Neurosci. Official J. Soc. Neurosci.*, **17**, 5175–5182.
  51. Dryden, S., Pickavance, L., Frankish, H.M. and Williams, G. (1995) Increased neuropeptide Y secretion in the hypothalamic paraventricular nucleus of obese (fa/fa) Zucker rats. *Brain Res.*, **690**, 185–188.
  52. Yan, Q., Rosenfeld, R.D., Matheson, C.R., Hawkins, N., Lopez, O.T., Bennett, L. and Welcher, A.A. (1997) Expression of brain-derived neurotrophic factor protein in the adult rat central nervous system. *Neurosci.*, **78**, 431–448.
  53. Kust, B.M., Copray, J.C., Brouwer, N., Troost, D. and Boddeke, H.W. (2002) Elevated levels of neurotrophins in human biceps brachii tissue of amyotrophic lateral sclerosis. *Exp. Neurol.*, **177**, 419–427.
  54. Mousavi, K., Parry, D.J. and Jasmin, B.J. (2004) BDNF rescues myosin heavy chain IIB muscle fibers after neonatal nerve injury. *Am. J. Physiol. Cell Physiol.*, **287**, C22–C29.
  55. Verhovshek, T., Cai, Y., Osborne, M.C. and Sengelaub, D.R. (2010) Androgen regulates brain-derived neurotrophic factor in spinal motoneurons and their target musculature. *Endocrinology*, **151**, 253–261.
  56. Henderson, C.E., Camu, W., Mettling, C., Gouin, A., Poulsen, K., Karihaloo, M., Rullamas, J., Evans, T., McMahon, S.B., Armanini, M.P. *et al.* (1993) Neurotrophins promote motor neuron survival and are present in embryonic limb bud. *Nature*, **363**, 266–270.
  57. Horch, H.W. and Katz, L.C. (2002) BDNF release from single cells elicits local dendritic growth in nearby neurons. *Nat. Neurosci.*, **5**, 1177–1184.
  58. McAllister, A.K., Lo, D.C. and Katz, L.C. (1995) Neurotrophins regulate dendritic growth in developing visual cortex. *Neuron*, **15**, 791–803.
  59. McAllister, A.K., Katz, L.C. and Lo, D.C. (1997) Opposing roles for endogenous BDNF and NT-3 in regulating cortical dendritic growth. *Neuron*, **18**, 767–778.
  60. Mamounas, L.A., Altar, C.A., Blue, M.E., Kaplan, D.R., Tessarollo, L. and Lyons, W.E. (2000) BDNF promotes the regenerative sprouting, but not survival, of injured serotonergic axons in the adult rat brain. *J. Neurosci. Official J. Soc. Neurosci.*, **20**, 771–782.
  61. Xu, J., Gingras, K.M., Bengston, L., Di Marco, A. and Forger, N.G. (2001) Blockade of endogenous neurotrophic factors prevents the androgenic rescue of rat spinal motoneurons. *J. Neurosci. Official J. Soc. Neurosci.*, **21**, 4366–4372.
  62. Ernfors, P., Kucera, J., Lee, K.F., Loring, J. and Jaenisch, R. (1995) Studies on the physiological role of brain-derived neurotrophic factor and neurotrophin-3 in knockout mice. *Int. J. Dev. Biol.*, **39**, 799–807.
  63. Tapia-Arancibia, L., Rage, F., Givalois, L. and Arancibia, S. (2004) Physiology of BDNF: focus on hypothalamic function. *Front. Neuroendocrinol.*, **25**, 77–107.
  64. Levin, B.E. (2007) Neurotrophism and energy homeostasis: perfect together. *Am. J. Physiol. Regul. Integr. Comp. Physiol.*, **293**, R988–R991.
  65. Noble, E.E., Billington, C.J., Kotz, C.M. and Wang, C. (2011) The lighter side of BDNF. *Am. J. Physiol. Regul. Integr. Comp. Physiol.*, **300**, R1053–R1069.
  66. Nicholson, J.R., Peter, J.C., Lecourt, A.C., Barde, Y.A. and Hofbauer, K.G. (2007) Melanocortin-4 receptor activation stimulates hypothalamic brain-derived neurotrophic factor release to regulate food intake, body temperature and cardiovascular function. *J. Neuroendocrinol.*, **19**, 974–982.
  67. Fargali, S., Sadahiro, M., Jiang, C., Frick, A.L., Indall, T., Coglian, V., Welagen, J., Lin, W.J. and Salton, S.R. (2012) Role of neurotrophins in the development and function of neural circuits that regulate energy homeostasis. *J. Mol. Neurosci.*, **48**, 654–659.
  68. Wang, C., Bomberg, E., Billington, C., Levine, A. and Kotz, C.M. (2007) Brain-derived neurotrophic factor in the hypothalamic paraventricular nucleus reduces energy intake. *Am. J. Physiol. Regul. Integr. Comp. Physiol.*, **293**, R1003–R1012.
  69. Bariohay, B., Lebrun, B., Moysé, E. and Jean, A. (2005) Brain-derived neurotrophic factor plays a role as an anorexigenic factor in the dorsal vagal complex. *Endocrinology*, **146**, 5612–5620.
  70. Thorleifsson, G., Walters, G.B., Gudbjartsson, D.F., Steinthorsdottir, V., Sulem, P., Helgadóttir, A., Styrkarsdóttir, U., Gretarsdóttir, S., Thorlacius, S., Jonsdóttir, I. *et al.* (2009) Genome-wide association yields new sequence variants at seven loci that associate with measures of obesity. *Nat. Genet.*, **41**, 18–24.
  71. Willer, C.J., Speliotes, E.K., Loos, R.J., Li, S., Lindgren, C.M., Heid, I.M., Berndt, S.I., Elliott, A.L., Jackson, A.U., Lamina, C. *et al.* (2009) Six new loci associated with body mass index highlight a neuronal influence on body weight regulation. *Nat. Genet.*, **41**, 25–34.
  72. Barkho, B.Z., Song, H., Aimone, J.B., Smrt, R.D., Kuwabara, T., Nakashima, K., Gage, F.H. and Zhao, X. (2006) Identification of astrocyte-expressed factors that modulate neural stem/progenitor cell differentiation. *Stem Cells Dev.*, **15**, 407–421.
  73. Szulwach, K.E., Li, X., Smrt, R.D., Li, Y., Luo, Y., Lin, L., Santistevan, N.J., Li, W., Zhao, X. and Jin, P. (2010) Cross talk between microRNA and epigenetic regulation in adult neurogenesis. *J. Cell Biol.*, **189**, 127–141.
  74. Livak, K.J. and Schmittgen, T.D. (2001) Analysis of relative gene expression data using real-time quantitative PCR and the 2(-Delta Delta C(T)) Method. *Methods*, **25**, 402–408.
